# Supplementary material for: Integrated gene expression and alternative splicing analysis in human and mouse models of Rett Syndrome
Source: Research Square preprint supplement (doi:10.21203/rs.3.rs-4895075/v1), 2024-10-11
Supplement: Supplementary file 1 [file e8358d83829ae9f74d8fa084.docx]

**Table 2.** Dataset description. The table shows the metadata associated with each BioProject. n.a. not available; *N/A* not applicable

|  | **Bioproject** | **Mecp2 mutation** | **Functional effect** | **Strain** | **Age** | **Sex** | **Dataset** | **Biological system** | **# of biol. rep./group (WT-RTT)** | **#DEGs**  **(|log2FC|>0.58 & q-value<0.05)** | **#DAS genes (20% p<0.05)** |
| --- | --- | --- | --- | --- | --- | --- | --- | --- | --- | --- | --- |
| Human | PRJNA509687 | Isogenic iPSC line #37 (WT) and iPSC line #20 (RTT) (Mecp2 exons 3-4 deletion, *Cheung et al., 2011*) | Loss of function | *N/A* | 6 yrs  (at sampling) | F | PRJNA509687_NPC | iPSC derived neural progenitor cells | 2-3 | 1968 | 339 |
| PRJNA509687_N | iPSC derived cortical neurons | 3 | 1898 | 187 |
| PRJNA383878 | c.806delG(p.G269fs); c.763C>T (p.R255X); exon1 del; c.433C>T, p.R145C; c.473C>T, p.T158M; c.502C>T, p.R168X | n.a. | *N/A* | 1-9 yrs | F | PRJNA383878_BL | Blood | 5-6 | 1677 | 10 |
| PRJNA482372 | R133C mutation in exon 4 introduced in hESCs | Impaired DNA binding ability of MeCP2 | *N/A* | N/A | M | PRJNA482372_N | Differentiated cortical interneurons (D74) | 2 | 9 | 287 |
| PRJNA527289 | c.473C>T; exon 1 del; no mutation in Mecp2 detected in 2 RTT subjects | n.a. | *N/A* | 16-32 yrs | F | PRJNA527289_CC | Brain (cingulate cortex) | 4 | 49 | 12 |
| PRJNA527289_TC | Brain (temporal cortex) | 4 | 334 | 31 |
| PRJNA419983 | Isogenic iPSC lines derived from GM17567 (R567; 1461A>G mutation) and GM07982 (R982; 705delG mutation) | Loss of function | *N/A* | 5 or 25 yrs (at sampling) | F | PRJNA419983_NPC | iPSC derived neural progenitor cells | 5-4 | 4 | 36 |
| PRJNA419983_N | iPSC derived interneurons | 4 | 428 | 38 |
| Mouse | PRJNA278144 | Mecp2tm1.1Bird (Mecp2-)  (Deletion of exon 3 and 4, *Guy et al., 2001*) | Loss of function | 129SvEvTac | 7 wks | M | PRJNA278144_HY | Brain (hypothalamus) | 3 | 506 | 44 |
| PRJNA279421 | Mecp2tm1.1Bird (Mecp2-) (Deletion of exon 3 and 4, *Guy et al., 2001*) | Loss of function | C57BL/6 | 8-10 wks | M | PRJNA279421_VC | Brain (visual cortex) | 3 | 12 | 6 |
| PRJNA355642 | Mecp2tm1.1Bird (Mecp2-)(Deletion of exon 3 and 4, *Guy et al., 2001*) | Loss of function | C57BL/6J | 24 wks | F | PRJNA355642_MG | Microglia | 3 | 30 | 8 |
| PRJNA379366 | Mecp2tm1.1Jae (Deletion of exon 3, *Chen et al., 2001*) | Loss of function | C57BL/6 | 8-9 wks | M | PRJNA379366_CX | Brain (whole cortex) | 4 | 77 | 4 |
| PRJNA414468 | n.a. | Loss of function | FVB.129 F1-hybrids | 8-9 wks | M | PRJNA414468_CB | Brain (cerebellum) | 3 | 217 | 37 |
| PRJNA448674 | Mecp2tm1Bird (Mecp2lox) (l*oxP* sites flanking exons 3-4, *Guy et al., 2001*) crossed with Ndor1Tg(UBC-cre/ERT2)1Ejb (*Ruzankina et al., 2007*) | Loss of function (conditional, from 12 wks) | C57BL/6J | 22 wks | n.a. | PRJNA448674_CB | Brain (cerebellum) | 4 | 1344 | 15 |
| PRJNA448674_CC | Brain (whole cortex) | 4 | 75 | 20 |
| PRJNA451208 | Mecp2tm1.1Bird (Mecp2-) (Deletion of exon 3 and 4, *Guy et al., 2001*) | Loss of function | C57BL/6 | P0, P1 | M | PRJNA451208_CN | Neuron-enriched cortical cultures | 3 | 4 | 15 |
| 7 wks | M | PRJNA451208_HP | Brain (hippocampus) | 2 | 83 | 39 |
| PRJNA526675 | Mecp2tm1.1Bird (Mecp2-) (Deletion of exon 3 and 4, *Guy et al., 2001*) | Loss of function | C57BL/6 | 8 wks | M | PRJNA526675_FB_KO | Forebrain (cortex & hippocampus) | 10 | 199 | 0 |
| Mecp2tm2.1Meg (Mecp2R306C) (R306C mutation in exon 4, *Lyst et al., 2013*) | Loss of interaction between MECP2 and the NCoR/SMRT co-repressor complex | C57BL/6 | 8-12 wks | M | PRJNA526675_FB_R306C | Forebrain (cortex & hippocampus) | 10 | 130 | 1 |
| PRJNA531153 | Mecp2tm1.1Bird (Mecp2-) (Deletion of exon 3 and 4, *Guy et al., 2001*) | Loss of function | C57BL/6J | 8 wks | M | PRJNA531153_CB | Brain (cerebellum) | 3 | 60 | 64 |
| PRJNA531153_BL | Blood | 3 | 274 | 141 |
